# Supplementary material for: MicroRNA-1 acts as a tumor suppressor microRNA by inhibiting angiogenesis-related growth factors in human gastric cancer
Source: PubMed Central journal article supplement (PMC5741792; doi:10.1007/s10120-017-0721-x), 2017-05-10

**Online Resource 2.** miR-1 expression was negatively correlated with *VEGF-A*, *MET* and *EDN1*.

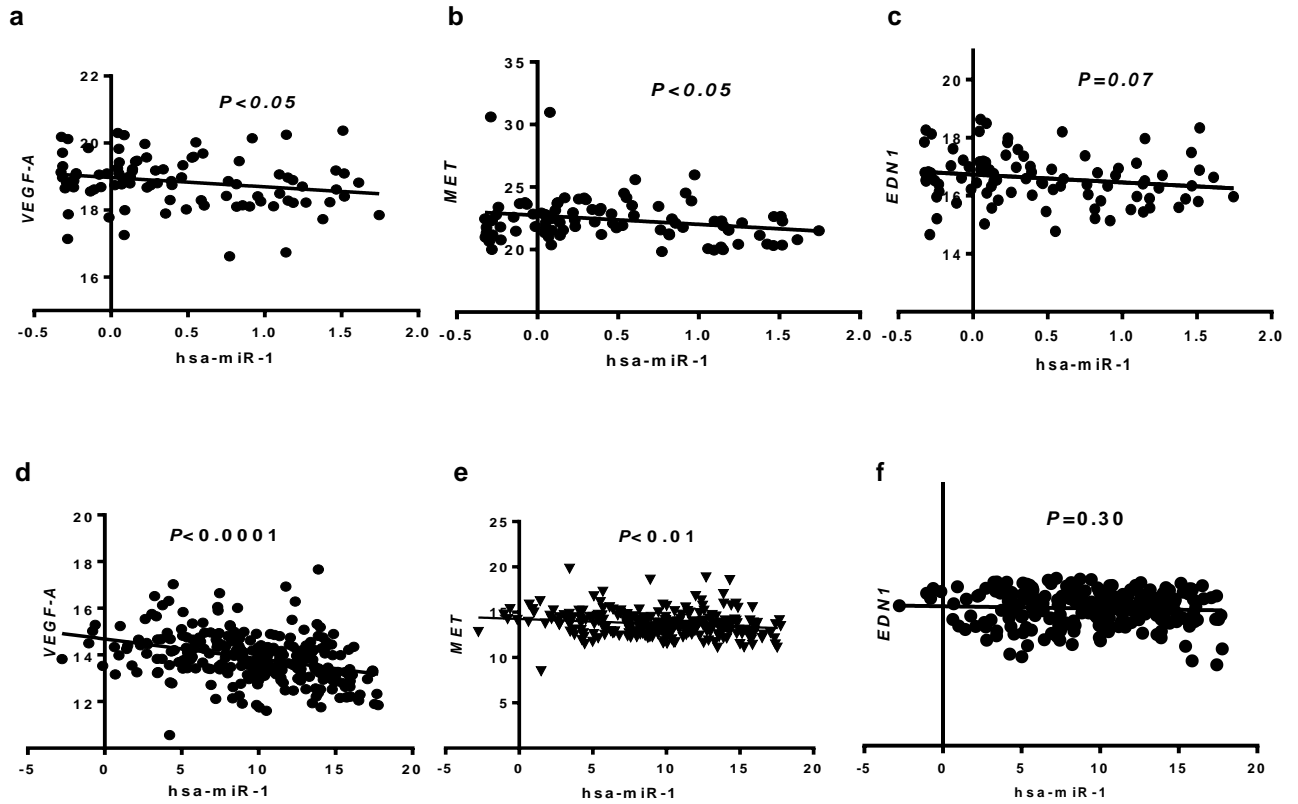

Supplement: 10120_2017_721_MOESM2_ESM.pdf [file 10120_2017_721_MOESM2_ESM.pdf]
